# Supplementary material
Source: publisher figshare collection journal article supplement (https://frontiersin.figshare.com/ndownloader/files/30972406)
Supplement: Supplementary file 1 [file 30972406]

Table S2 Bacterial taxa in the samples at the class levels.

| Sample | Alphaproteobacteria | Actinobacteria | Gammaproteobacteria | Acidimicrobiia | Flavobacteriia | Chloroplast | Betaproteobacteria | Verrucomicrobiae | Planctomycetacia | Sphingobacteriia | Other | Unclassified |
| --- | --- | --- | --- | --- | --- | --- | --- | --- | --- | --- | --- | --- |
| IW1 | 25.91% | 2.49% | 20.91% | 24.75% | 6.55% | 2.07% | 2.36% | 0.20% | 0.89% | 0.69% | 11.75% | 1.43% |
| IW2 | 20.44% | 2.92% | 13.59% | 24.84% | 5.58% | 3.38% | 2.13% | 0.15% | 0.80% | 0.75% | 23.49% | 1.93% |
| IW3 | 13.06% | 2.45% | 41.27% | 9.35% | 2.02% | 2.06% | 9.39% | 0.59% | 2.28% | 0.46% | 13.57% | 3.50% |
| IW4 | 21.72% | 6.27% | 16.47% | 14.38% | 5.12% | 1.79% | 8.55% | 0.39% | 1.57% | 0.69% | 18.62% | 4.44% |
| IW5 | 22.67% | 3.97% | 17.80% | 8.97% | 5.16% | 3.82% | 7.29% | 0.61% | 1.35% | 1.05% | 20.08% | 7.24% |
| IW6 | 19.95% | 3.82% | 15.84% | 17.47% | 4.81% | 2.87% | 6.95% | 0.80% | 3.95% | 0.57% | 19.60% | 3.38% |
| PW1 | 33.05% | 5.27% | 4.34% | 0.62% | 7.19% | 37.13% | 0.32% | 4.04% | 1.29% | 2.35% | 3.13% | 1.27% |
| PW2 | 18.22% | 9.13% | 7.95% | 12.05% | 10.68% | 20.91% | 1.32% | 7.12% | 5.36% | 1.11% | 5.02% | 1.14% |
| PW3 | 12.06% | 20.63% | 9.22% | 35.96% | 7.96% | 3.68% | 1.90% | 0.37% | 0.46% | 0.86% | 4.87% | 2.04% |
| PW4 | 7.66% | 20.82% | 9.30% | 44.62% | 4.78% | 2.66% | 0.72% | 0.94% | 0.35% | 0.83% | 4.80% | 2.52% |
| PW5 | 30.71% | 9.22% | 18.36% | 0.56% | 11.92% | 8.75% | 1.18% | 0.82% | 4.83% | 5.81% | 4.80% | 3.04% |
| PW6 | 54.13% | 3.60% | 16.91% | 1.44% | 8.45% | 1.60% | 0.84% | 0.73% | 0.61% | 1.54% | 7.08% | 3.07% |
| PW7 | 30.30% | 12.24% | 11.72% | 3.98% | 3.86% | 13.42% | 0.62% | 3.39% | 2.75% | 2.53% | 11.52% | 3.67% |
| PW8 | 31.47% | 3.56% | 8.09% | 2.22% | 7.39% | 2.31% | 1.11% | 6.75% | 21.01% | 3.26% | 9.66% | 3.16% |
| PW9 | 27.28% | 4.13% | 7.07% | 2.76% | 6.68% | 28.85% | 0.92% | 1.56% | 0.86% | 6.04% | 11.69% | 2.17% |
| PW10 | 30.33% | 5.98% | 10.86% | 6.01% | 5.28% | 4.63% | 1.13% | 12.93% | 5.60% | 3.64% | 11.54% | 2.07% |
| PW11 | 17.60% | 6.15% | 14.09% | 4.18% | 5.72% | 33.91% | 0.94% | 1.30% | 0.85% | 1.99% | 10.11% | 3.15% |
| PW12 | 41.58% | 7.79% | 12.58% | 0.91% | 7.71% | 0.32% | 0.77% | 4.34% | 10.43% | 2.02% | 8.65% | 2.89% |
| PW13 | 46.42% | 4.55% | 26.48% | 3.40% | 7.21% | 1.13% | 1.72% | 0.29% | 0.36% | 0.92% | 6.28% | 1.25% |
| PW14 | 16.42% | 25.39% | 10.22% | 19.53% | 15.11% | 0.84% | 2.06% | 1.29% | 0.19% | 0.20% | 5.28% | 3.48% |
| PW15 | 20.75% | 31.66% | 16.91% | 14.17% | 6.01% | 0.43% | 1.89% | 0.09% | 0.19% | 0.18% | 4.78% | 2.95% |
| PW16 | 23.99% | 25.43% | 18.73% | 9.35% | 9.91% | 0.41% | 1.52% | 0.20% | 0.35% | 0.59% | 6.16% | 3.36% |
| PW17 | 22.08% | 21.24% | 16.20% | 16.04% | 11.17% | 0.51% | 2.57% | 1.32% | 0.28% | 0.26% | 4.81% | 3.52% |
| PW18 | 31.46% | 10.69% | 18.11% | 9.90% | 11.93% | 1.36% | 2.14% | 0.43% | 0.42% | 2.12% | 8.99% | 2.44% |
| PW19 | 17.46% | 25.65% | 14.45% | 11.44% | 18.83% | 2.10% | 3.46% | 0.21% | 0.14% | 0.51% | 3.60% | 2.15% |
| PW20 | 19.19% | 27.72% | 9.32% | 13.66% | 15.15% | 2.00% | 5.46% | 0.71% | 0.20% | 0.30% | 3.96% | 2.33% |
| PW21 | 12.17% | 21.41% | 10.94% | 29.36% | 9.70% | 0.25% | 2.15% | 1.30% | 0.20% | 0.60% | 7.37% | 4.57% |
| PW22 | 10.62% | 25.36% | 24.06% | 21.32% | 6.74% | 0.24% | 0.98% | 0.51% | 0.14% | 0.26% | 6.87% | 2.89% |
| PW23 | 26.93% | 27.37% | 13.20% | 11.43% | 6.23% | 0.65% | 2.03% | 1.57% | 0.16% | 2.26% | 6.32% | 1.87% |
| PW24 | 10.24% | 51.65% | 8.16% | 15.53% | 1.66% | 0.41% | 1.45% | 0.91% | 0.21% | 0.09% | 5.48% | 4.22% |
| PW25 | 15.57% | 24.95% | 15.00% | 17.97% | 14.97% | 0.20% | 1.47% | 0.41% | 0.25% | 0.20% | 6.05% | 2.97% |
| PW26 | 16.34% | 25.30% | 7.11% | 16.99% | 5.79% | 1.15% | 1.73% | 14.26% | 0.61% | 2.62% | 5.31% | 2.77% |
